# Supplementary material for: Effect of Wearing a Face Mask on Hand-to-Face Contact by Children in a Simulated School Environment: The Back-to-School COVID-19 Simulation Randomized Clinical Trial
Source: PubMed Central journal article supplement (PMC9593317; doi:10.1001/jamapediatrics.2022.3833), 2022-10-24
Supplement: jamapediatr-e223833-s002.pdf [file jamapediatr-e223833-s002.pdf]

1 ***Understanding the Impact of Public Health Measures Planned for School Reopening during COVID-19***  
2 ***using Simulation Exercises***  
3

4 **Principal Investigators:**

5 Michelle Science, Infectious Disease Physician, The Hospital for Sick Children

6 Clyde Matava, Anesthesia, Department of Anesthesia and Pain Medicine, The Hospital for Sick Children

7  
8 **Co-Investigators:**

- 9 • Ari Bitnun – The Hospital for Sick Children (Infectious Diseases)
- 10 • Upton Allen – The Hospital for Sick Children (Infectious Diseases)
- 11 • Shaun Morris – The Hospital for Sick Children (Infectious Diseases)
- 12 • Ronni Cohn – The Hospital for Sick Children (General Pediatrics)
- 13 • Jeremy Friedman – The Hospital for Sick Children (General Pediatrics)
- 14 • Eyal Cohen – The Hospital for Sick Children (General Pediatrics)
- 15 • Catherine Birken – The Hospital for Sick Children (General Pediatrics)
- 16 • Laurie Streitenberger – The Hospital for Sick Children (Infection Prevention and Control)
- 17 • Daphne Korczak – The Hospital for Sick Children (Psychiatry)
- 18 • Samantha Anthony – The Hospital for Sick Children (Qualitative Research)
- 19 • Rachel Solomon – The Hospital for Sick Children (Chief Data Officer)
- 20 • Lennox Huang – The Hospital for Sick Children (Critical Care, Simulation)
- 21 • Emily Louca – The Hospital for Sick Children (Simulation)
- 22 • Alison Dodds – The Hospital for Sick Children (Simulation)
- 23 • Sunayna Vuppala – The Hospital for Sick Children (Simulation)
- 24 • Stacie Carroll – The Hospital for Sick Children (Teacher)
- 25 • Giovanna Panzera – The Hospital for Sick Children (Teacher)
- 26 • Jodi Greenwood – The Hospital for Sick Children (Teacher)
- 27 • Laura Alexander – The Hospital for Sick Children (Occupational Health and Safety)
- 28 • Rulan Parekh – The Hospital for Sick Children (Research Methodology)
- 29 • Catherine Walsh – The Hospital Sick Children (Simulation, Human Factors)
- 30 • Sloane Freeman – Unity Health (Pediatrics)
- 31 • Doug Campbell – Unity Health (Simulation, Human Factors)
- 32 • Peter Jüni – St. Michael’s Hospital, IHPME (Research Methodology, Statistics)
- 33 • Bryan Maguire – The Hospital for Sick Children (Data Analysis, Statistics)
- 34 • Derek Stevens – The Hospital for Sick Children (Data Analysis, Statistics)
- 35 • Mark Crawford – The Hospital for Sick Children (Research Methodology, Simulation)
- 36 • Monica Caldeira – The Hospital for Sick Children (Research Coordinator)
- 37 • Allison McGeer – Mount Sinai Hospital (Research Methodology, Infection Prevention and Control)
- 38 • Dominik Mertz – McMaster Hospital (Research Methodology, Infection Prevention and Control)
- 39 • Sarah Khan – McMaster Children’s Hospital (Pediatric Infection Prevention and Control)
- 40 • Maureen Cividino – Public Health Ontario (Occupational Health and Safety)
- 41 • Jessica Hopkins – Public Health Ontario (Public Health)
- 42 • Laura Bourns – Public Health Ontario (Public Health)
- 43 • Kevin Schwartz – Unity Health (Pediatric Infectious Diseases)
- 44 • Vinita Dubey – Toronto Public Health (Public Health)

45  
46 **1.0 INTRODUCTION**

47 **1.1 Overview:** The American Academy of Pediatrics<sup>1</sup> and the Canadian Pediatric Society<sup>2</sup> have issued  
48 statements emphasizing the importance of children returning to school for broader child health. The  
49 Ministry of Education has released guidance for return to school during the COVID-19 pandemic which  
50 includes recommended health and safety measures.<sup>3</sup> However, there are limited details provided around  
51 the implementation of these measures.

52  
53 **1.2 COVID-19 in children:** Multiple reports from around the world indicate that children account for less  
54 than 5-10% of SARS-CoV-2 infections.<sup>4-6</sup> In Canada, of 104,370 COVID-19 cases reported as of July 4<sup>th</sup> 2020,  
55 7,470 (7.16%) were in children aged 0-19 years.<sup>7</sup> While this may, at least in part, be related to testing  
56 practices and early school closure, evidence is mounting that children may be less susceptible to SARS-CoV-  
57 2 infection and less likely to transmit the virus to others.<sup>8-10</sup> There is also strong evidence that the majority  
58 of children who become infected with SARS-CoV-2 are either asymptomatic or have only mild symptoms,  
59 such as cough, fever, and sore throat.<sup>4,5,11-13</sup> While serious disease requiring hospitalization is known in  
60 children, including multisystem inflammatory syndrome in children (MIS-C), this is relatively rare and is  
61 generally treatable.<sup>14-16</sup> Severe disease requiring intensive care admission occurs in a small minority of  
62 paediatric cases, particularly among those with certain underlying medical conditions, but the clinical  
63 course is much less severe than in adults and deaths are uncommon.<sup>4,6,17,18</sup>

64  
65 **1.3 Transmission risk from children and in schools:** While the concerns around infection and infectious  
66 complications in children appear to be minimal, it is important to consider the potential role children may  
67 play in transmission (especially to vulnerable individuals both inside and outside of the classroom) and  
68 disease propagation. Children are considered to be efficient transmitters of influenza and other respiratory  
69 virus infections and this was one of the rationales for early school closures. However, data from multiple  
70 countries is emerging that children do not play a predominant role in the transmission of SARS-CoV-2.<sup>8,9,19-</sup>  
71 <sup>21</sup> This is further supported by the evidence to date that schools do not appear to have played a significant  
72 role in transmission<sup>22</sup> and even when cases have been identified in schools, contact tracing and testing  
73 have not identified a large number of secondary cases.<sup>23-26</sup> Furthermore, several countries have reopened  
74 schools without demonstrating a significant increase in cases.<sup>23-27</sup>

75  
76 **1.4 Risk mitigation strategies:** Despite the reassuring evidence cited above, it should be recognized that it  
77 will not be possible to remove all risk of infection and disease now that SARS-CoV-2 is well established in  
78 many communities. Mitigation of risk, while easing restrictions, will be needed for the foreseeable future to  
79 balance health with social and economic goals. The mitigation strategies implemented for school reopening  
80 have varied from country to country, ranging from strict enforcement of physical distancing and masking,  
81 to no masking and emphasis on cohorting to allow for close interactions. While outbreaks have been  
82 reported in schools in some countries (e.g. Israel<sup>28</sup>), the risk mitigation strategies appear to have been  
83 largely successful in the majority of other countries.<sup>23-26</sup> The Ministry of Education has released guidance  
84 for return to school during the COVID-19 pandemic which includes recommended health and safety  
85 measures.<sup>3</sup> However, there remains controversy around how several measures will be implemented upon  
86 return to school.

87  
88 **1.5 Face masks/coverings in children:** In particular, the use of face masks/coverings in children of various  
89 ages has been suggested as an important element to reducing SARS-CoV-2 (COVID-19) transmission in the  
90 school setting.<sup>29</sup> In contrast, others have raised concerns that this may lead to an increased risk of infection  
91 due to increased touching of the masks and face by children and will be difficult to enforce, especially in  
92 younger children.<sup>1</sup> The Province of Ontario has not mandated the use of facemasks/coverings in indoor  
93 spaces which is contrary to many local bylaws, although schools are excluded from the bylaws.<sup>30</sup>

94

95 Unfortunately, there is limited data on masking in children on which to make evidence informed decisions.  
96 Some studies have evaluated the habitual and voluntary behaviours such as face mask-wearing and hand  
97 hygiene in children and adolescents. Wong et al (2005)<sup>31</sup>, in a telephone survey of adolescents following  
98 SARS in Hong Kong, reported that only 54.8% of 230 respondents reported practicing all recommended  
99 behaviours that included face mask wearing and hand hygiene. While the study does not identify whether  
100 these adolescents practiced these behaviours in school or at home, the presence of environmental cues  
101 and a high perceived health threat were factors associated with increased compliance. In a questionnaire  
102 study among all 13,217 elementary school children in Matsumoto City in Japan, the self-reported use of  
103 face masks was found to offer higher protection from self-reported influenza diagnosis by a physician  
104 (2014/15 season) in older children (Grade 4-6) than younger one (Grade 1-3).<sup>32</sup> The ability of older children  
105 to control their health-protective and infection control measures and activities such as face mask wearing  
106 and handwashing were proposed as possible reasons for the protection conferred in the older age group. A  
107 randomised cluster trial of households during the 2009/2010 and 2010/11 influenza seasons in Germany  
108 compared masking, masking and hand hygiene (HH) or control in 84 households<sup>33</sup>. There was no significant  
109 effect from either intervention in the primary analysis. There was a potential effect observed in the  
110 subgroup that implemented masking + HH within 36 hours of symptom onset of the index case (adjusted  
111 odds ratio (OR) 0.16, 95% CI, 0.03-0.92). There have been no prospective studies evaluating the impact of  
112 face mask wearing vs. no face mask in the school environment.  
113

114 **1.5 Relevance:** It is critical to gain a better understanding of the benefits and risks associated with the  
115 proposed health and safety measures and how teachers and students can be protected. Real-world  
116 simulation exercises provide an excellent opportunity to gather this information in a smaller setting and to  
117 understand implementation considerations prior to broader implementation of any of these health and  
118 safety measures for the start of the school year.  
119

## 120 **2.0 OBJECTIVES**

121

122 The primary objective of this study is to evaluate the impact of the use of face masks/coverings, across  
123 various children's age groups, on hand-to-face contact among students in a simulated class environment.  
124 Secondary objectives include:

- 125 • To evaluate the impact, across various children's age groups, of the use of face masks/coverings  
126 compared to no masks at school on the spread of a safe biological indicator (fluorescein or Glo  
127 Germ) from a group of children within a classroom to 1) the hands/face of classmates or the  
128 teacher within the same classroom and 2) to other surfaces in the classroom.
- 129 • To evaluate the impact, across various children's age groups, of wearing facemasks versus no  
130 facemasks in a class at school on 1) other personal behaviours (i.e. mask removal, hand-to-mucous  
131 membrane contact), 2) person to person interactions and 3) teacher and child experiences based  
132 on their days in class.
- 133 • To evaluate the use of face shields compared to face masks/coverings worn by teachers as personal  
134 protective equipment in terms of 1) effectiveness as source control (using monochromatic camera  
135 and dark room), 2) teacher opinions including preference (compared to face mask), ability to  
136 communicate, comfort, and 3) student opinions, including comfort with the teacher, ability to  
137 learn, distractibility, opinion.
- 138 • To simulate the environment upon return to school with the purpose of 1) identifying teacher and  
139 student concerns with a focus on physical distancing and hand hygiene, 2) determining the amount  
140 of time children are within both 1 meter and 2 meters of other students inside and outside of the  
141 classroom environment and 3) number of hand hygiene events per child per day.  
142

### 143 **3.0 RESEARCH PLAN:**

144

145 **3.1 Brief Overview:** This will be a prospective study simulating return to school for two full days prior to the  
146 start of the school year in September. Volunteer students and teachers from six grade ranges will be  
147 recruited to participate in the study. In each grade range, there will be two classes that will participate, one  
148 that will be assigned to wear face masks/coverings (experimental group/class) and the other that will not  
149 wear any face masks/coverings (control group/class). Students will be randomized to either the masking  
150 (experimental) or no masking (control) class in their appropriate grade. Personal behaviours and person-to-  
151 person interactions will be recorded using video cameras. In addition, a safe biological indicator will be  
152 applied to the hands and either mask or tip of the nose to simulate potential asymptomatic infection in a  
153 subset of students. Other students will have water applied so that students are blinded to who has the  
154 indicator. Cameras will be used to document how the indicator moves throughout the classroom.

155

156 **3.2 Study Site:** The study will occur at Upper Canada College (UCC) and Bishop Strachan School (BSS) to run  
157 a mock curriculum over two days prior to the start of the school year in September.

158 **3.3. Study Population:** Grade ranges will include 1) Senior Kindergarten (children who have just completed  
159 JK or SK in the 2019-2020 year), 2) Grades 1-2, 3) Grades 3-4, 4) Grades 5-6, 5) Grades 7-8 and 6) high  
160 school. A total of 12 teachers and up to 240 students will be recruited. Final class sizes will be in accordance  
161 with Ministry of Education and public health guidelines.

### 162 **3.4 Inclusion and exclusion criteria**

163 To be included in the study, students must have attended school during 2019-2020 school year and provide  
164 informed consent (student in Grade 7 or older) or parental consent (SK – Grade 6) and assent (if  
165 appropriate). Students will be excluded if they:

- 166 • Require additional resources or support beyond what can be provided by the single class teacher
- 167 • have been exposed to an individual that has tested positive for SARS-CoV-2 in the 14 days prior to  
168 the simulation
- 169 • test positive for COVID-19 in the 14 days prior to the simulation
- 170 • have signs or symptoms of COVID-19, as identified on the screening form (See Screening Form)  
171 before the simulations
- 172 • travel outside Canada in the last 14 days
- 173 • known hypersensitivity or allergy to the biological indicator (Fluorescein dye/GloGerm)

174 To be included in the study, teachers must be certified teachers and provide informed consent to  
175 participate. Teachers will be excluded if they:

- 176 • have been exposed to an individual that has tested positive for SARS-CoV-2 in the 14 days before  
177 the simulation
- 178 • test positive for COVID-19 in the 14 days before the simulation
- 179 • have signs or symptoms of COVID-19, as identified on the screening form (See Screening form)  
180 before the simulations
- 181 • travel outside Canada in the last 14 days
- 182 • known hypersensitivity or allergy to the biological indicator (Fluorescein dye/GloGerm)

183

184 **3.4.1 Recruitment:** Students and teachers will be approached by school principals. Recruitment will be  
185 directed first to students and teachers from the GTA and broadened to other areas if additional participants  
186 are needed. This communication will direct participants to a website that will contain study information  
187 and provide details about how to gain access to webinars that will provide more information. While

188 detailed information will be provided, this will not replace the full consent process. At a date following the  
189 occurrence of the webinars, individuals will be provided the option to indicate their plan to participate in  
190 the study via an online form. This form will ask the parent/student to indicate the child's sex, which grade  
191 they just completed, in addition to contact information. This online sign up will be followed up with a call  
192 (telephone or virtual platform – see below) from the research coordinator to start the consent discussion,  
193 finalize decisions around consent and assent (ideally via teleconference) and proceed to the online  
194 consent/signature process. Consent will be obtained from students if they are deemed to have capacity to  
195 consent (likely Grade 7 and above, but to be confirmed based on capacity assessment). If a student  
196 provides informed consent to participate in the study, a parental permission form will also be completed to  
197 document their support for the study. For students who do not have capacity to consent, parental consent  
198 will be obtained (likely from students Grade 6 and younger). The assent form will be reviewed and assent  
199 will be verbal and will be completed at the time of parental consent and documented on the REDCap form.  
200 The aim will be for this to occur over a virtual platform with video capability in order for the research  
201 coordinator to assess willingness to participate.

- 202 • Attempt to obtain consent over Microsoft teams (or other approved platform), but telephone is an  
203 alternative if it is not feasible given limitations to technologies
- 204 • A capacity assessment and willingness to continue to participate will be confirmed in person prior  
205 to doing NP swab testing. This will include two questions 1) do you understand the study and what  
206 will be happening if you are involved? 2) are you willing to participate?

207  
208 Active communication: The local principal will reach out to potential participants via email (See Email  
209 Communication and Poster). We will ask them to include details about our study, including the website  
210 information and the RC and PI contact information if they are interested.

211  
212 For teachers, options for recruitment may include emails and communication from leadership. The process  
213 will be approved by the school and they will be responsible for determining the teachers that will be invited  
214 to participate. This communication will direct teachers to a website that will contain study information and  
215 the study coordinator and PI information will be provided so that teachers can indicate their interest in  
216 participating independent of the school. Once teachers indicate interest in participation, the SickKids study  
217 team will contact the teacher to go through the virtual consent process and online consent signature.

218 **Incentives:** Upon completion of the study, students will be provided with volunteer hours and a \$50  
219 Amazon gift card. Teachers will be compensated for the two days of teaching (\$200/day) and the  
220 testing/training days (\$100), for a total of \$500.00.

### 221 **3.5 Study Methods**

222 **3.5.1: Study cohort:** We will recruit up to 240 students and 12 teachers for the simulation. Once recruited,  
223 information on both students and teachers will be collected using an online REDCap survey, including  
224 name, full date of birth, address and contact information in order to register the participant in the SickKids  
225 Epic Research Module to facilitate ordering of a COVID-19 swabs (Data Collection Form 1 – Registration).  
226 For students, the school health questionnaire (as per school requirements) will also be completed using the  
227 online REDCap survey to document any underlying health conditions, medications, allergies and other  
228 special requirements for the safe operation of school (Data Collection Form 2 – Health Form). This  
229 information will not be linked to any study data, but will be provided to the school and the student's  
230 teacher. A third data collection form will be completed via Redcap by the parent and student around their  
231 concerns and views related to public health measures for school (Data Collection Form 3 – Baseline Survey).  
232 This form will be de-identified after completion and linked only to the classroom to which the student is  
233 assigned. It will need to be linked to the classroom to adjust for any baseline differences between the  
234 experimental and control groups.

235 **3.5.2: Randomization and blinding:** Once teachers and students are recruited; students will be assigned to  
236 one of two appropriate classes based on the grade they just completed: students assigned to wear masks  
237 will be placed in one class; the other class (herein referred to as the ‘no mask’ group) will be for students  
238 who will not be wearing masks (Grades 4 and lower) or wearing masks only when physical distancing  
239 cannot be maintained (Grade 5 and up). Central randomization will be done one to two days prior to the  
240 simulation using an adequately concealed interactive web-based response system in REDCap (see below),  
241 based on computer-generated randomization schedules stratified by age and sex. The allocation will be  
242 communicated to parents and students at least half a day before the start of the simulation to ensure  
243 appropriate preparation time. Teachers will wear a face shield if within 2 m of students in both  
244 experimental and control arm during day 1 (implementation phase), and face masks if within 2 m of  
245 students in both experimental and control arm during day 2 when outcome data will be collected. Students  
246 and teachers aware that personal behaviours are being recorded, but will be blinded to the primary  
247 outcome (hand-to-face contact) and other specific behaviours that are being monitored.

248 On each of day 1 and day 2 of the simulation, students in both experimental and control arm will be  
249 randomized in a 1:4 ratio to either a Bio-tracer versus a placebo Bio-tracer. This corresponds to a frequency  
250 of the Bio-tracer of 20%, to represent the upper range of asymptomatic colonization. Students, teachers  
251 and video assessors will be blinded to which students have bio-tracer or placebo.

252 **3.5.3: Pre-Simulation:** Prior to the simulation, an information package will be distributed to families  
253 including information about COVID-19 testing (procedure, location, what happens if the test is positive),  
254 logistics for the simulation (arrival and departure times, what to bring) and general safety information  
255 (hand hygiene information and facemask, if appropriate based on randomization) (Appendix X - Back to  
256 School Package). Testing for COVID-19 will be completed on teachers and students by the SickKids mobile  
257 testing unit at the school 24-48 hours before the first day of the simulation to minimize the risk of COVID-  
258 19 transmission during the simulation experiment. Students and teachers will not be required to self-isolate  
259 following the test, in keeping with current recommendations for asymptomatic testing. A workflow will be  
260 instituted onsite to ensure that the testing is completed in a timely manner to avoid crowds. Information  
261 will be provided to participants and families about the necessary steps should the swab be positive. The  
262 swab results will be used for Toronto Public Health reporting reasons only and will not be linked to study  
263 data (positive participants will be excluded from participating – see inclusion and exclusion criteria).

#### 264 **3.5.4 Intervention / Simulation:**

265 **Simulation Scenario Setting:** The simulation will occur at UCC and BSS in designated classrooms. Policies  
266 and procedures will replicate the plans for return to school in September. Hand hygiene (either alcohol-  
267 based hand rub or soap and water) will be available and regular cleaning will occur by trained staff  
268 throughout the simulation days. Students in the face mask classes will be instructed to bring their own face  
269 mask/covering to wear throughout the school day. Face masks/coverings will be available at the school if a  
270 student assigned to a masking class forgets or loses their face mask. In order to record the classroom and  
271 school activity for review and analysis, a secure and privileged CCTV set-up commonly used in simulation  
272 studies will be used on a closed mesh network. Six cameras will be set up in each classroom and additional  
273 cameras in common spaces (play-ground, hallways). An observer will be placed in the bathroom to observe  
274 hand hygiene, distancing and mask use. Proximity sensors will be worn by each participant and will log each  
275 encounter where participants are within 1 m and 2 m of other participants. Both the video recording and  
276 proximity sensors will be included in the consent process.

277 **Simulated Curriculum:** The curriculum for the school days has been developed by teachers (See  
278 Curriculum) to simulate a regular school day. It will include a brief overview of mindfulness strategies to  
279 help coping with any anxiety around return to school or around mask-wearing. There will be no COVID-19  
280 specific material included in the curriculum as this may be triggering for some students and precipitate

281 increased anxiety (recommendation from SickKids Psychiatry). However, teachers will be given resources  
282 and training on how to handle questions should they arise (See COVID-19 Q+A for teachers – developed by  
283 Infectious Diseases, approve by Public Health). Mental health resources will be available on site on both  
284 simulation days (social work, psychology) should the simulations trigger anxiety.

285 **Simulation Day Procedures:** Students will arrive at school as outlined in the “Back to school package”.  
286 Procedures will be in accordance with the school plans for return to school in September (i.e. staggered  
287 start times). On arrival, students in each class will congregate in a designated area (i.e. outside, weather  
288 permitting). When the class is assembled, a safe invisible biological indicator (Fluorescein) will be applied to  
289 the hands and the tip of the nose to a random 3 students in each class to be consistent with the potential  
290 for up to 20% asymptomatic infection in children. Other children will have water applied so that teachers  
291 and students are blinded to the students with the indicator. The children’s hand, face and classroom  
292 environment will be photographed 3 times per day as to identify the fluorescent indicator. Video recording  
293 will be utilized to record all events with cameras mounted in each classroom and public recess area.  
294 Proximity sensors worn by each participant will log non-identifying log data on the number of durations of  
295 proximity contact. The students will enter the classroom and the curriculum will proceed as outlined in  
296 “simulated curriculum” above. Students will bring their lunches and eat in their assigned classroom. Mental  
297 health resources will be available on site should any concerns arise for teachers or students.

298 For teachers, simulation exercises will be done with face shields to evaluated their effectiveness as source  
299 control (Appendix X – Teacher Face Shield Experiment Procedure).

300 **Video Coding:** A trained rater will watch the video recorded simulations independently. Initially, key events  
301 and actions in the videos (e.g., touching face, removing a mask, activities causing proximity of students) will  
302 be time stamped. Subsequently codes will be assigned to key events using the SEIPS framework to identify  
303 safety threats and categorize them by theme. The SEIPS model depicts a system as a human-centered with  
304 6 interacting components that influence system performance, including persons – both individuals and  
305 teams (e.g., teacher, students, classroom unit), task(s) (e.g., in-class work, recess play), tools and  
306 technologies (i.e., objects that people use to do work or that assist people in doing work), organizational  
307 conditions (e.g., schedules, policies, resources), the internal (physical) environment (e.g., physical layout  
308 and available space) and external environment. It uses a human factors approach to identify safety threats  
309 among the interactions of the system components. The deliberate inclusion of persons emphasises that  
310 systems should work to support individuals.

311  
312 Coding will be both deductive, based on themes from the SEIPS analytic framework, and inductive, looking  
313 purposefully for potential safety threats that fall outside of the prescribed framework. If a priori subthemes  
314 are not sufficient, the framework may need to be refined or expanded to include new subcategories that lie  
315 under the six main SEIPS framework categories. If new sub-themes are identified, further rater training and  
316 calibration will be undertaken to ensure acceptable inter-rater reliability around those subthemes. All the  
317 codes identified can be identified more than once. Severity of each safety threat will be described using the  
318 quality improvement harm scoring system (potential to cause harm; likely to cause minimal harm, likely to  
319 cause significant temporary harm, likely to cause permanent harm and death). Additionally, each event will  
320 be categorized using the Human Factors Analysis and Classification System as an unsafe act (related to  
321 human behaviour), unsafe condition (related to the environment or organisation) or near miss (a situation  
322 that involved workers without physical consequence for them).

323  
324 **3.5.5 Study Outcomes:** The **primary outcome** will be the number of hand-to-face contacts per hour per  
325 student. This was chosen as the primary outcome for several reasons: 1) measuring actual infection  
326 transmission is not possible in this simulation setting and 2) of the outcomes possible to obtain, it was felt

327 to be most strongly associated with the risk of infection transmission (the most clinically meaningful  
328 endpoint).

329 **Secondary outcomes** will include:

- 330 1. The number of hand-to-mucus membrane contact with eyes, nose or mouth per hour per student
- 331 2. The number of hand-to-face contacts with skin or membrane contact per hour per student
- 332 (excluding isolated mask contact)
- 333 3. Proximity contact (being within 1 metre and 2 meters of another person)
- 334 4. The proportion of the class (including students and teacher) who were not tagged with the bio-  
335 tracer but have dye on their hands and/or face by the end of the day. It is acknowledged that this  
336 measure focuses on contact and fomite transmission and will not assess the protective impact of  
337 masks for droplet source control or protection. However, it will assess whether mask wearing leads  
338 to increased risk of fomite transmission, thereby quantifying potential “harms” from masks.
- 339 5. The presence of fluorescein dye on the teacher
- 340 6. The number of high touch surfaces in the classroom contaminated with bio-tracer at the end of the  
341 day. High touch surfaces in the classroom will include desks, chairs, light switches, classroom door  
342 and door handles, cell phones (as appropriate) and any common objects. Surfaces will be identified  
343 *a priori* in the classroom and marked as contaminated (dye in any location) or not contaminated  
344 (no dye) at the end of the day.
- 345 7. The number of interpersonal hand holding per hour per student
- 346 8. The number of interpersonal physical contact per hour per student
- 347 9. The number of hand hygiene episodes per hour per student
- 348 10. The number of mask removals per student per hour (in masking arm only). Masks for source  
349 control would only be effective if worn properly. As such, we will quantify the duration of  
350 appropriate mask wearing to help balance the risks / benefits.
- 351 11. Self-reported experiences of students and teachers in a qualitative substudy
- 352 12. Human Factors influencing behaviours

353

### 354 **3.6 Material Transfer / data linkage and management:**

355 **3.6.1 Computer Systems:** Personal health information (PHI) required for testing will be collected using  
356 REDCap. REDCap is the Hospital for Sick Children’s research-focused electronic data capture system  
357 REDCap, under an agreement with the software’s development consortium, led by Vanderbilt University.  
358 REDCap supports two secure, web-based applications designed exclusively to support data capture for  
359 research studies. REDCap is a PHP web application served by Apache Tomcat over a 128-bit SSL connection  
360 using a signed certificate. The application relies on a study-specific data dictionary defined *a priori* by the  
361 investigation team. The data dictionary is the foundation for custom extract from the electronic health  
362 record and validation of coding of variables. Authentication of research staff will be performed via LDAP  
363 using HSC’s enterprise Active Directory service. The application generates a complete audit trail of user  
364 activity, provides reporting, and has an automated export mechanism to common statistical packages (SAS,  
365 SPSS, Stata, R/S-Plus).

366 The REDCap MySQL database is replicated in real time to a completely redundant instance of MySQL. The  
367 redundant instance is available for restoration of the primary database or for manual failover in the case of  
368 primary database failure. Time-stamped backup files are made from the replicated database daily by HSC  
369 Research Information Systems using automated backup routines. Backup files are encrypted and  
370 transferred to a secure file server accessible only to designated personnel. A rolling seven-day window of  
371 backup files is maintained in an immediately available online state, with a larger window maintained in a  
372 compressed file archive



373 **3.6.2 Confidentiality of Subjects:** To protect the privacy and confidentiality of the participants, the video  
374 data will be deleted after six months. We estimate it will take one-two weeks to de-code the video data  
375 and the extra time provides a small safe guard should the video need to be revisited during analysis or  
376 manuscript preparation. Audio recordings from focus groups will be retained for six months and then  
377 deleted.

378 **3.6.3 Physical Security:** All server hardware is securely located in a dedicated secure area. Physical access  
379 to the data center is monitored, logged, controlled, and limited to approved personnel. System  
380 administration and support is provided by HSC Research Information Systems. Servers and applications are  
381 actively monitored 24x7x365 and replicated between two geographically separate, fully redundant data  
382 centers. Server backup at the file system level is performed multiple times per day, and where appropriate  
383 for volatile data, a multi-day real-time accessible rolling archive can be made available. System and data  
384 recovery are accomplished through documented standard operating procedures. Virtual machines will be  
385 configured with storage provided through HSC Research Information Systems' enterprise storage solution.

386 **3.6.4 Virtual Environment Security:** HSC has made a significant investment in an enterprise-wide VMWare  
387 virtualized environment. This technology allows multiple "virtual" machines with potentially different  
388 operating systems to be hosted on the same physical server hardware. This infrastructure greatly simplifies  
389 monitoring, reduces server administration overhead, promotes cost-effective and efficient use of  
390 computing resources, and allows for future flexibility and enhanced capacity with minimal disruption.

391 The virtualization technology used by VMWare completely separates virtual machines running on the same  
392 hardware. Each virtual machine ("guest") instance is completely partitioned into its own sandbox and is  
393 unable to interact with or see other guests running on the same physical machine. Access to administer the  
394 VMWare environment is limited to authorized HSC Research Information Systems personnel.

395 **3.6.5 Operating System, Database, and Storage Security:** All application software is deployed to virtual  
396 machines running CentOS (a variant of Red Hat Linux), or if software requires it, Microsoft Windows Server.  
397 HSC Research Information Systems personnel manage the base operating system installation and also run  
398 regular scans for vulnerabilities, deploying patches as appropriate if software components are out of date.

399 HSC implements enterprise authentication via the LDAP protocol using Microsoft's Active Directory service.  
400 All operating system level authentication will use the HSC Active Directory service. Passwords must meet or  
401 exceed HSC Information Security requirements for length and complexity, and they are required to be  
402 rotated on a regular basis. Database account information will be stored in a password vault. Operating  
403 system level access would be granted only to study personnel and Research Information Systems  
404 administrators. All other individuals would be denied access.

405 In cases where the operating system hosts an application that must communicate over the open Internet (a  
406 website for example), the virtual machine will be deployed to the HSC DMO (a location behind HSC's  
407 enterprise firewall which allows limited access via the Internet). HSC Information Security regularly scans  
408 virtual machines deployed in the DMO for vulnerabilities and currency of patches, providing reports and  
409 follow-up scans to both HSC Research Information Systems system administrators and to application  
410 owners. All applications and servers will be subjected to these scans, with appropriate remediation of any  
411 vulnerability. The HSC enterprise firewall will be configured to only allow connections on ports required for  
412 communication with non-HSC personnel (for example, those required for web access). Any other access  
413 (for example, to perform operating system maintenance or modify system configuration files) must occur  
414 behind the HSC firewall.

415 Any system which does not need to be directly accessed via the public Internet (a relational database  
416 server for example), will be deployed behind HSC's enterprise firewall that provides security for HSC's  
417 clinical and research systems. In addition, each individual virtual machine will have its own firewall enabled

418 by the operating system, and only those ports required for administration or communication with public-  
419 facing systems will be open. These steps will ensure that no access is possible for non-STUDY individuals.

420 Data at rest will be secured using operating system and/or database-level security. Database-level  
421 authentication will be implemented using strong passwords, meeting or exceeding the HSC requirements  
422 for password strength. All data will be stored using the HSC enterprise storage solution managed by  
423 Research Information Systems.

424 **3.6.6 Data Collection and Management:** Data will be uploaded to the SDB through a secure web portal.  
425 Data will be stored on a password encrypted HSC computer and access will be limited to HSC investigators  
426 and HSC database managing staff. Participating institutions may enter data into the registry using a web  
427 interface following approval by the HSC IT team. The Redcap Software will be programmed to remove  
428 institution identifiers when aggregate data is released.

429 Self-reported experiences of students and teachers will be collected using both qualitative and quantitative  
430 research methods. Students (> grade 4) and teachers will be asked several open-ended questions post-  
431 simulation to gather feedback on the learning environment and their experience with the mitigation  
432 strategies. For students, these questions will be posed in-person to each class as a group at the end of the  
433 second day of school. For teachers, these questions will be posed during a virtual focus group conducted  
434 via ZOOM Healthcare or Microsoft Teams, at the end of the second day of school. These interviews / focus  
435 group will be conducted by research staff with training in qualitative methods and will follow an interview  
436 guide (see attached). The interviews / focus group will be audio-recorded. Students and teachers will also  
437 complete a post-simulation REDCap form.

438 **3.6.7 Future Use of Data:** Data will not be released to third parties. Only the final results of the study  
439 (i.e. aggregate data / results) will be provided to the school and non-SickKids study team members.

440 **3.6.8 Risk Assessment:** The primary risk of this registry is breach of confidentiality. The study investigators  
441 are taking several steps to minimize this risk

- 442 • Data will be transmitted and stored securely and in an encrypted fashion online
- 443 • Hard data will be stored in locked cabinets in the co-PIs, SickKids offices in rooms 7253 Black Wing and  
444 2406 Black Wing
- 445 • Only a small group of investigators will have access to the data set

446 **3.7 Statistical Analysis:** We will use a mixed linear regression model adjusted for age and sex with a  
447 random intercept for class to analyse the primary outcome. 95% confidence intervals will be bootstrapped.

448 **Secondary outcomes:** We will use appropriate mixed regression models adjusted for age and sex with a  
449 random intercept for class to analyse different secondary outcomes. No adjustments for multiplicity will be  
450 made for the analysis of secondary outcomes.

451 **Analysis of video:** All identified codes (See “video codes”) will be charted onto a framework matrix,  
452 mapped and open for review by the study team. This matrix is a table that organizes codes by the group  
453 (i.e., mask versus non-masked classrooms) in which they occur and by safety threat theme to enable  
454 comparison within and across groups. The nature, severity and number of safety threat detected using the  
455 SEIPS framework will then be compared across study groups (i.e., mask versus non-masked classrooms)  
456 both descriptively and quantitatively. Summary descriptive statistics will be generated for the number of  
457 total safety threats identified per group and time observed. The number of safety threat detected across  
458 detection modalities will also be compared using bivariate and regression analyses to identify influencing  
459 factors and will be included as co-factors in primary outcome

460 **Proximity data:** Proximity data will be summarized in cumulative number and duration per participant and  
461 group and included as a co-factor in the primary outcome.

462  
463 **Qualitative data:** The audio-recorded interviews / focus group will be transcribed verbatim for qualitative  
464 thematic analysis using a qualitative description approach. All data will be read and analyzed by multiple  
465 members of the research team. Deductive thematic analysis will be utilized and codes will be developed  
466 through line-by-line review of the interviews / focus group discussion using NVivo. Through this review  
467 process, codes emerging repeatedly in various parts of the transcript will be noted and comparatively  
468 analyzed by multiple research team members for purposes of consistency.

469 **3.8 Sample size:** Assuming an intra-cluster correlation coefficient of 0.01, a standard deviation of the  
470 number of hand-to-face contacts per hour per student of 6, and a minimal class size of 15 students, we  
471 estimate that 12 classes randomized in a 1:1 ratio to either the experimental or to the control arm, will  
472 result in more than 80% power to detect an increase in the number of hand-to-face contacts per hour per  
473 student from an average of 30 in the control arm to an average of 33 in the experimental arm at a two-  
474 sided alpha of 0.05.

475  
476 The design will be adaptive using an appropriate sequential design. The information size (corresponding to  
477 the sample size required to achieve 80% power to detect a difference of 3 hand-to-face contacts per hour  
478 per student between experimental and control arm) will be estimated after the first round of simulations  
479 based on the actually observed standard deviations, intra-cluster correlation coefficient and the number of  
480 hand-to-face contacts per hour per student in the control arm. If the first round of simulations reached the  
481 information size, or if pre-specified monitoring boundaries for either a difference or for equivalence are  
482 crossed after the first round of simulations, the trial will be stopped. If neither the information size was  
483 reached nor a boundary crossed, we will perform a second round of simulations increasing the sample size  
484 as appropriate to reach conditional power of 80% under the alternate hypothesis given the accumulated  
485 data.

486  
487 **3.9 Timelines:** See attached Flow diagram

### 488 **3.10: Ethical Considerations:**

- 489 1) Teacher and student consent and assent (where appropriate) will be obtained by the Hospital for  
490 Sick Children.
- 491 2) While consent will be clear that the purpose is to monitor personal behaviours, parents and  
492 students will be kept unaware to specific primary and secondary hypotheses to minimize the  
493 Hawthorne effect.
- 494 3) Risk of infection: As we will be bringing a group of students and staff together, there is a risk that it  
495 could lead to transmission of COVID-19.
- 496 a. Mitigation plan: all children and teachers will be tested for COVID-19 the day prior to the  
497 simulation to reduce the risk of infection. Common play spaces will be cleaned throughout  
498 the day as per planned implementation in September.
- 499 b. Daily screening for symptoms will occur as per the current Ministry of Education return to  
500 school recommendation.
- 501 4) Emotional risk for children: it is important to acknowledge that school was stopped abruptly and  
502 children were told that it wasn't safe. Preliminary data to date suggests, however, that children's  
503 worsened mental health in Ontario is as a result of public health emergency measures including  
504 school closures, rather than as a result of COVID-related anxiety (COVID-19 and Kids Mental Health  
505 in Ontario preliminary data, REB#1000070222). Nonetheless, some children may have anxiety upon  
506 return to school and/or in participating in the simulations.

- 507 a. Mitigation plan: mindfulness will be included as part of the classroom teaching curriculum  
508 on the day of the simulations.  
509 b. Mask-wearing for a prolonged period of time may also be anxiety provoking or frustrating.  
510 A student in the masking arm can refuse to wear the mask at any point and this would be  
511 included as a study outcome and they would remain in the study.  
512 c. Parents will be provided with the mental health resources should they feel that additional  
513 mental health support for their child is required. Information will be contained in the “back  
514 to school package”.
- 515 5) Data Handling: All data and records generated during this study will be kept confidential in  
516 accordance with Institutional policies and HIPAA on subject privacy. Safeguards will be described  
517 outlined in the Data Collection and Management procedures. All video data will be permanently  
518 deleted once data coding has been performed. This will be done within 72 hours and will be  
519 verified as per the Data Collection and Management procedures  
520 6) Oversight team: A study steering committee will oversee and ensure smooth operation of the study

521 **3.11 Knowledge Translation:** We have drawn on our team’s clinical, epidemiological, public health and  
522 policy-relevant research experience to shape the research question and study design, ensuring that our  
523 findings will be of maximal values to the individual, schools and public health. The goal of our knowledge  
524 translation activities is to inform policies and practices related to return to school.

525  
526  
527  
528  
529  
530  
531  
532

533 REFERENCES

534  
535  
536  
537  
538  
539  
540  
541  
542  
543  
544  
545  
546  
547  
548  
549  
550  
551  
552  
553  
554  
555  
556  
557  
558  
559  
560  
561  
562  
563  
564  
565  
566  
567  
568  
569  
570  
571  
572  
573  
574  
575  
576

1. American Academy of Pediatrics. COVID-19 Planning Considerations: Guidance for School Re-entry. 2020. <https://services.aap.org/en/pages/2019-novel-coronavirus-covid-19-infections/clinical-guidance/covid-19-planning-considerations-return-to-in-person-education-in-schools/> - .XvZQ5fK-xNs.email (accessed July 4, 2020).
2. Canadian Pediatric Society. Supporting a Safe Return to School for Canada's Children and Youth. 2020. [https://www.cps.ca/uploads/advocacy/Supporting a Safe Return to School.pdf](https://www.cps.ca/uploads/advocacy/Supporting_a_Safe_Return_to_School.pdf) (accessed July 4, 2020).
3. Ministry of Education. Approach to Reopening Schools for the 2020-2021 School Year. Available at <http://www.ontario.ca/page/approach-reopening-schools-2020-2021-school-year>. (Access Date July 2, 2020).
4. Public Health Ontario. COVID19 - What We Know So Far About... Infection in Children. Updated May 15, 2020. Available at: <https://www.publichealthontario.ca/-/media/documents/ncov/what-we-know-children-feb-21-2020.pdf?la=en>.
5. CDC COVID-19 Response Team. Coronavirus Disease 2019 in Children - United States, February 12-April 2, 2020. *MMWR Morb Mortal Wkly Rep* 2020; **69**(14): 422-6.
6. Stokes EK, Zambrano LD, Anderson KN, et al. Coronavirus Disease 2019 Case Surveillance - United States, January 22 - May 30, 2020. *MMWR*. Available at: [https://www.cdc.gov/mmwr/volumes/69/wr/mm6924e2.htm?s\\_cid=mm6924e2\\_w](https://www.cdc.gov/mmwr/volumes/69/wr/mm6924e2.htm?s_cid=mm6924e2_w) (Accessed June 15). 2020.
7. Public Health Agency of Canada. Epidemiological summary of COVID-19 cases in Canada. Last update June 15, 2020. Available at: <https://health-infobase.canada.ca/covid-19/epidemiological-summary-covid-19-cases.html - a3>.
8. Ludvigsson JF. Children are unlikely to be the main drivers of the COVID-19 pandemic - a systematic review. *Acta Paediatr* 2020.
9. Davies NG, Klepac P, Liu Y, et al. Age-dependent effects in the transmission and control of COVID-19 epidemics. *Nat Med* (2020). <https://doi.org/10.1038/s41591-020-0962-9>.
10. Lavezzo E, Franchin E, Ciavarella C, et al. Suppression of a SARS-CoV-2 outbreak in the Italian municipality of Vo'. *Nature* 2020.
11. Ludvigsson JF. Systematic review of COVID-19 in children shows milder cases and a better prognosis than adults. *Acta Paediatr* 2020; **109**(6): 1088-95.
12. Dong Y, Mo X, Hu Y, et al. Epidemiology of COVID-19 Among Children in China. *Pediatrics* 2020; **145**(6).
13. Zimmermann P, Curtis N. COVID-19 in Children, Pregnancy and Neonates: A Review of Epidemiologic and Clinical Features. *Pediatr Infect Dis J* 2020; **39**(6): 469-77.
14. Whittaker E, Bamford A, Kenny J, et al. Clinical Characteristics of 58 Children With a Pediatric Inflammatory Multisystem Syndrome Temporally Associated With SARS-CoV-2. *JAMA* 2020.
15. Feldstein LR, Rose EB, Horwitz SM, et al. Multisystem Inflammatory Syndrome in U.S. Children and Adolescents. *N Engl J Med* 2020.
16. Dufort EM, Koumans EH, Chow EJ, et al. Multisystem Inflammatory Syndrome in Children in New York State. *N Engl J Med* 2020.

- 577 17. Shekerdemian LS, Mahmood NR, Wolfe KK, et al. Characteristics and Outcomes of Children  
578 With Coronavirus Disease 2019 (COVID-19) Infection Admitted to US and Canadian Pediatric  
579 Intensive Care Units. *JAMA Pediatr* 2020.
- 580 18. Gotzinger F, Santiago-Garcia B, Noguera-Julian A, et al. COVID-19 in children and  
581 adolescents in Europe: a multinational, multicentre cohort study. *Lancet Child Adolesc Health*  
582 2020.
- 583 19. Posfay-Barbe KM, Wagner N, Gauthey M, et al. COVID-19 in Children and the Dynamics of  
584 Infection in Families. *Pediatrics* 2020.
- 585 20. Munro APS, Faust SN. Children are not COVID-19 super spreaders: time to go back to  
586 school. *Arch Dis Child* 2020; **105**(7): 618-9.
- 587 21. National Institute for Public Health and the Environment. Children and COVID-19. Available  
588 at <https://www.rivm.nl/en/novel-coronavirus-covid-19/children-and-covid-19>. (Accessed July 5,  
589 2020). 2020. <https://www.rivm.nl/en/novel-coronavirus-covid-19/children-and-covid-19>.
- 590 22. Yung CF, Kam KQ, Nadua KD, et al. Novel coronavirus 2019 transmission risk in educational  
591 settings. *Clin Infect Dis* 2020.
- 592 23. Heavey L, Casey G, Kelly C, Kelly D, McDarby G. No evidence of secondary transmission of  
593 COVID-19 from children attending school in Ireland, 2020. *Euro Surveill* 2020; **25**(21).
- 594 24. National Centre for Immunisation Research and Surveillance (NCIRS) NSW Government.  
595 COVID-19 in schools – the experience in NSW. Prepared by the National Centre for Immunisation  
596 Research and Surveillance (NCIRS). April 2020 Report. Available at: [http://ncirs.org.au/covid-19-in-](http://ncirs.org.au/covid-19-in-schools)  
597 [schools](http://ncirs.org.au/covid-19-in-schools).
- 598 25. Fontanet A, Grant R, Tondeur L, et al. SARS-CoV-2 infection in primary schools in northern  
599 France: A retrospective cohort study in an area of high transmission. *Preprint Article: Available at*  
600 <https://www.medrxiv.org/content/101101/2020062520140178v2> 2020.
- 601 26. National Institute for Public Health and the Environment (Netherlands). Children and  
602 COVID-19. Available at: [https://www.rivm.nl/en/novel-coronavirus-covid-19/children-and-covid-](https://www.rivm.nl/en/novel-coronavirus-covid-19/children-and-covid-19)  
603 [19](https://www.rivm.nl/en/novel-coronavirus-covid-19/children-and-covid-19) (Accessed June 11, 2020).
- 604 27. Center for Global Development. Back to School? Tracking COVID Cases as Schools Reopen.  
605 2020. <https://www.cgdev.org/blog/back-school-tracking-covid-cases-schools-reopen> (accessed  
606 July 4 2020).
- 607 28. Financial Times. Israel battles surge in coronavirus infections in schools.  
608 <https://www.ft.com/content/224fa625-657c-4ffb-a6a0-a40e04d685b9> (accessed July 4 2020).
- 609 29. Centers for Disease Control and Prevention. Public Health Considerations for Reopening  
610 Schools During the COVID-19 Pandemic. 2020 Available at  
611 [https://www.cdc.gov/coronavirus/2019-ncov/community/schools-childcare/schools-decision-](https://www.cdc.gov/coronavirus/2019-ncov/community/schools-childcare/schools-decision-tool.html)  
612 [tool.html](https://www.cdc.gov/coronavirus/2019-ncov/community/schools-childcare/schools-decision-tool.html)
- 613 30. City of Toronto. City of Toronto makes masks or face coverings mandatory in enclosed  
614 public spaces. Available at [https://www.toronto.ca/news/city-of-toronto-makes-masks-or-face-](https://www.toronto.ca/news/city-of-toronto-makes-masks-or-face-coverings-mandatory-in-enclosed-public-spaces/)  
615 [coverings-mandatory-in-enclosed-public-spaces/](https://www.toronto.ca/news/city-of-toronto-makes-masks-or-face-coverings-mandatory-in-enclosed-public-spaces/) (Access Date: July 2, 2020).
- 616 31. Wong CY, Tang CS. Practice of habitual and volitional health behaviors to prevent severe  
617 acute respiratory syndrome among Chinese adolescents in Hong Kong. *J Adolesc Health* 2005;  
618 **36**(3): 193-200.

- 619 32. Uchida M, Kaneko M, Hidaka Y, et al. Effectiveness of vaccination and wearing masks on  
620 seasonal influenza in Matsumoto City, Japan, in the 2014/2015 season: An observational study  
621 among all elementary schoolchildren. *Prev Med Rep* 2017; **5**: 86-91.
- 622 33. Suess T, Remschmidt C, Schink SB, et al. The role of facemasks and hand hygiene in the  
623 prevention of influenza transmission in households: results from a cluster randomised trial; Berlin,  
624 Germany, 2009-2011. *BMC Infect Dis* 2012; **12**: 26.  
625
