# Supplementary material for: Effect of Wearing a Face Mask on Hand-to-Face Contact by Children in a Simulated School Environment: The Back-to-School COVID-19 Simulation Randomized Clinical Trial
Source: PubMed Central journal article supplement (PMC9593317; doi:10.1001/jamapediatrics.2022.3833), 2022-10-24
Supplement: jamapediatr-e223833-s005.pdf [file jamapediatr-e223833-s005.pdf]

\*Indicates required information. Only first name, last name, and suffix will appear in PubMed.

| <b>*Group Name(s): Back to School COVID-19 School Study Group</b> |                   |                              |                             |                                        |                                                 |                                                                |                                                                                                   |
|-------------------------------------------------------------------|-------------------|------------------------------|-----------------------------|----------------------------------------|-------------------------------------------------|----------------------------------------------------------------|---------------------------------------------------------------------------------------------------|
| <b>*First Name and Middle Initial(s)</b>                          | <b>*Last Name</b> | <b>*Suffix (eg, Jr, III)</b> | <b>Academic Degrees</b>     | <b>Institution</b>                     | <b>Location (city, state/province, country)</b> | <b>Role or Contribution, eg, chair, principal investigator</b> | <b>Group (if more than 1 Group listed in the byline) and/or Subgroup (eg, Steering Committee)</b> |
| Upton                                                             | Allen             |                              | MBBS, MSc, FRCPC            | The Hospital for Sick Children         | Toronto, Ontario, Canada                        | Advisor                                                        |                                                                                                   |
| Allison D.                                                        | Alvares           |                              | BSc                         | The Hospital for Sick Children         | Toronto, Ontario, Canada                        | Research Assistant                                             |                                                                                                   |
| Catherine S.                                                      | Birken            |                              | MD MSc                      | The Hospital for Sick Children         | Toronto, Ontario, Canada                        | Advisor                                                        |                                                                                                   |
| Ahuva                                                             | Brown             |                              | MD                          | The Hospital for Sick Children         | Toronto, Ontario, Canada                        | Research Assistant                                             |                                                                                                   |
| Vanessa L.                                                        | Carbone           |                              | BSc                         | The Hospital for Sick Children         | Toronto, Ontario, Canada                        | Research Assistant                                             |                                                                                                   |
| Anne                                                              | Christie          |                              | MSc                         | The Hospital for Sick Children         | Toronto, Ontario, Canada                        | Research Assistant                                             |                                                                                                   |
| Maureen E.                                                        | Cividino          |                              | MD CCFP FCFP DOHS CCBOM CIC | Public Health Ontario                  | Toronto, Ontario, Canada                        | Advisor                                                        |                                                                                                   |
| Justine H.                                                        | Cohen-Silver      |                              | MSc MD FRCPC MPH            | St. Joseph's Health Centre             | Toronto, Ontario, Canada                        | Advisor                                                        |                                                                                                   |
| Ronald D.                                                         | Cohn              |                              | MD                          | The Hospital for Sick Children         | Toronto, Ontario, Canada                        | Advisor                                                        |                                                                                                   |
| Jennifer                                                          | Crosbie           |                              | PhD                         | The Hospital for Sick Children         | Toronto, Ontario, Canada                        | Advisor                                                        |                                                                                                   |
| Bruno R.                                                          | da Costa          |                              | PhD                         | University of Toronto                  | Toronto, Ontario, Canada                        | Statistical Support                                            |                                                                                                   |
| Blossom                                                           | Dharmaraj         |                              | HBSc, MEd                   | The Hospital for Sick Children         | Toronto, Ontario, Canada                        | Research Assistant                                             |                                                                                                   |
| Sloane J.                                                         | Freeman           |                              | MD MSc FRCPC                | St. Michael's Hospital                 | Toronto, Ontario, Canada                        | Advisor                                                        |                                                                                                   |
| Karolina                                                          | Gaebe             |                              | BMATH                       | The Hospital for Sick Children         | Toronto, Ontario, Canada                        | Research Assistant                                             |                                                                                                   |
| Omar                                                              | Hajjaj            |                              | N/A                         | University of Toronto                  | Toronto, Ontario, Canada                        | Research Assistant                                             |                                                                                                   |
| Lennox                                                            | Huang             |                              | MD MBA                      | The Hospital for Sick Children         | Toronto, Ontario, Canada                        | Advisor                                                        |                                                                                                   |
| Sarah                                                             | Khan              |                              | MD MSc                      | McMaster University                    | Hamilton, Ontario, Canada                       | Advisor                                                        |                                                                                                   |
| Eon                                                               | Lee               |                              | BSc                         | The Hospital for Sick Children         | Toronto, Ontario, Canada                        | Research Assistant                                             |                                                                                                   |
| Charlotte                                                         | Logeman           |                              | MPH                         | The Hospital for Sick Children         | Toronto, Ontario, Canada                        | Research Assistant                                             |                                                                                                   |
| Sanaz                                                             | Manteghi          |                              | PhD                         | The Hospital for Sick Children         | Toronto, Ontario, Canada                        | Research Assistant                                             |                                                                                                   |
| Clara                                                             | Moore             |                              | MSc                         | The Hospital for Sick Children         | Toronto, Ontario, Canada                        | Research Assistant                                             |                                                                                                   |
| Shaun K.                                                          | Morris            |                              | MD MPH                      | The Hospital for Sick Children         | Toronto, Ontario, Canada                        | Advisor                                                        |                                                                                                   |
| Julia                                                             | Orkin             |                              | MD MS FRCPC                 | The Hospital for Sick Children         | Toronto, Ontario, Canada                        | Advisor                                                        |                                                                                                   |
| Sydney D.                                                         | Pelger            |                              | BSc                         | The Hospital for Sick Children         | Toronto, Ontario, Canada                        | Research Assistant                                             |                                                                                                   |
| Lauren                                                            | Pickel            |                              | BSc                         | The Hospital for Sick Children         | Toronto, Ontario, Canada                        | Research Assistant                                             |                                                                                                   |
| Soha                                                              | Salman            |                              | BSc                         | The Hospital for Sick Children         | Toronto, Ontario, Canada                        | Research Assistant                                             |                                                                                                   |
| Ainslie                                                           | Shouldice         |                              | N/A                         | The Hospital for Sick Children         | Toronto, Ontario, Canada                        | Research Assistant                                             |                                                                                                   |
| Rachel                                                            | Solomon           |                              | MPH                         | The Hospital for Sick Children         | Toronto, Ontario, Canada                        | Advisor                                                        |                                                                                                   |
| Nisha                                                             | Thampi            |                              | MD MSc                      | Children's Hospital of Eastern Ontario | Ottawa, Ontario, Canada                         | Advisor                                                        |                                                                                                   |
| Kevin                                                             | Thorpe            |                              | MMATH                       | University of Toronto                  | Toronto, Ontario, Canada                        | Statistical Support                                            |                                                                                                   |
| Anna                                                              | Wasiak            |                              | BSc                         | The Hospital for Sick Children         | Toronto, Ontario, Canada                        | Research Assistant                                             |                                                                                                   |
| Jiayin                                                            | Xie               |                              | N/A                         | The Hospital for Sick Children         | Toronto, Ontario, Canada                        | Research Assistant                                             |                                                                                                   |
