# Supplementary material for: Effect of Wearing a Face Mask on Hand-to-Face Contact by Children in a Simulated School Environment: The Back-to-School COVID-19 Simulation Randomized Clinical Trial
Source: PubMed Central journal article supplement (PMC9593317; doi:10.1001/jamapediatrics.2022.3833), 2022-10-24
Supplement: jamapediatr-e223833-s006.pdf [file jamapediatr-e223833-s006.pdf]

## Data Sharing Statement

Science. Effect of Wearing a Face Mask on Hand-to-Face Contact by Children in a Simulated School Environment. *JAMA Pediatr.* Published October 24, 2022.

doi:10.1001/jamapediatrics.2022.3833

### Data

**Data available:** Yes

**Data types:** Deidentified participant data

**How to access data:** Deidentified participant data is available upon request after publication with a signed data access agreement.

**When available:** beginning date: 01-01-2023

### Supporting Documents

**Document types:** None

### Additional Information

**Who can access the data:** Researchers whose proposed use of the data has been approved and a data access agreement has been signed.

**Types of analyses:** For a specified purpose approved by study authors.

**Mechanisms of data availability:** After approval of proposal and with a signed data access agreement.
